# Supplementary material
Source: PubMed Central journal article supplement (PMC6641956)

# Supporting information

## Characterization of pseudo-lignin from steam exploded birch

Authors: Ida Aarum,<sup>\*,†</sup> Hanne Devle,<sup>†</sup> Dag Ekeberg,<sup>†</sup> Svein J. Horn,<sup>†</sup> and Yngve Stenstrøm<sup>†</sup>

<sup>†</sup>Faculty of Chemistry, Biotechnology and Food Science, Norwegian University of Life Sciences,  
P.O. Box 5003, N-1432, Ås, Norway

It includes 12 pages with 5 figures and 1 table.

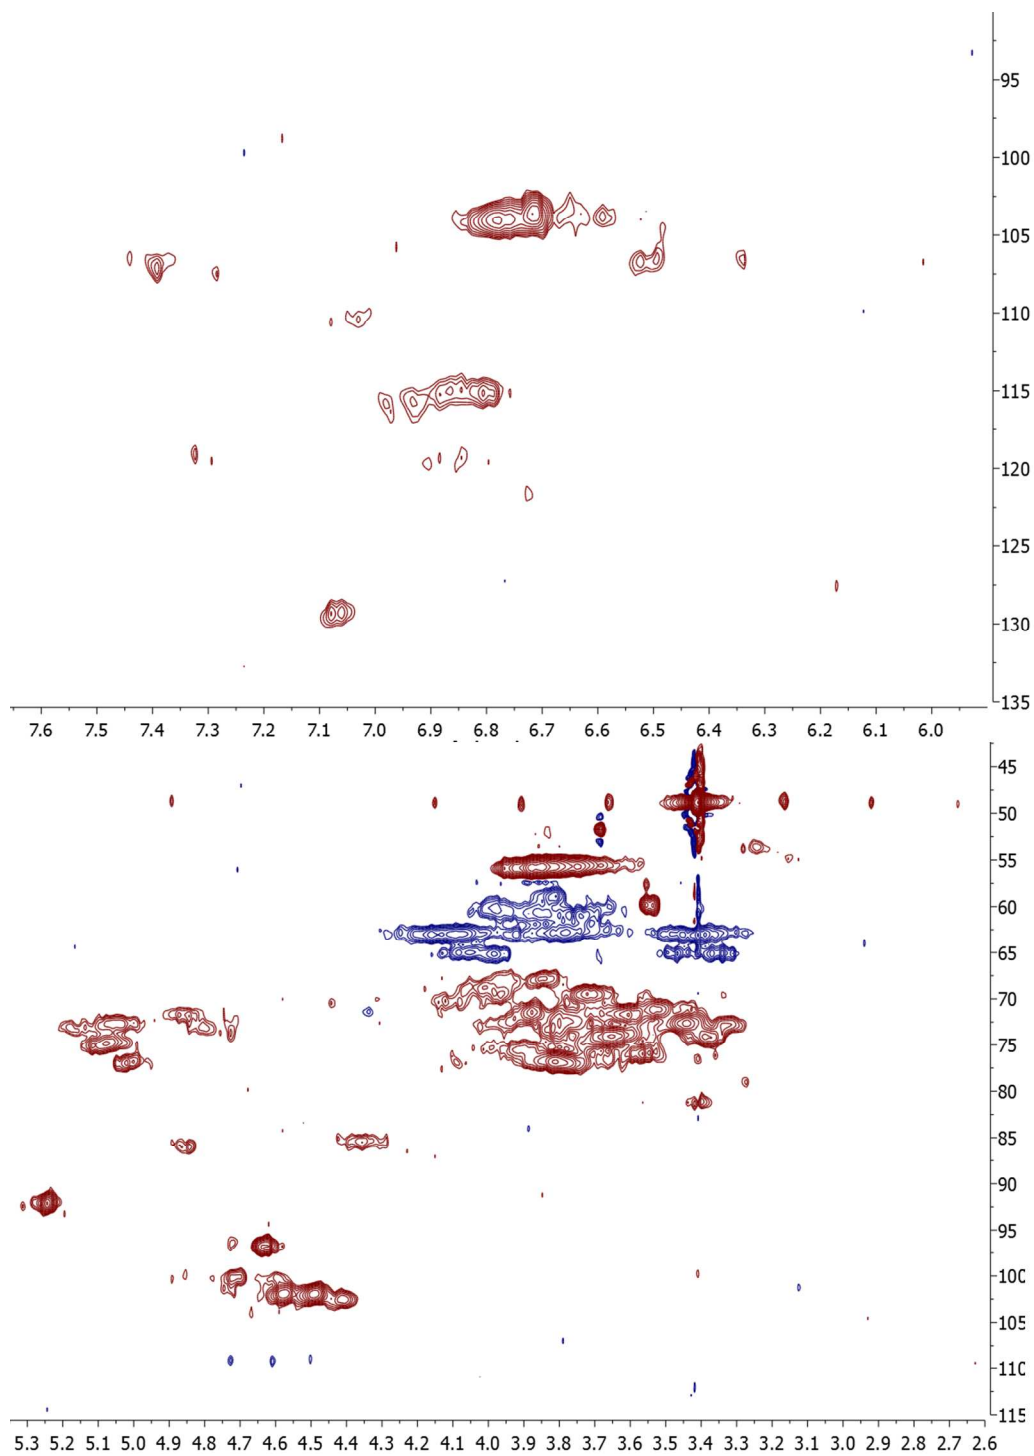

**Figure S1.** HSQC of SE-treated biomass of severity factor of 3.1 (170 °C – 10 min) in acetic acid- $\text{d}_4$ . The shift values are slightly more upshift than with  $\text{DMSO-d}_6$ . The spectra are focused on aromatic region (above) and aliphatic region (below).

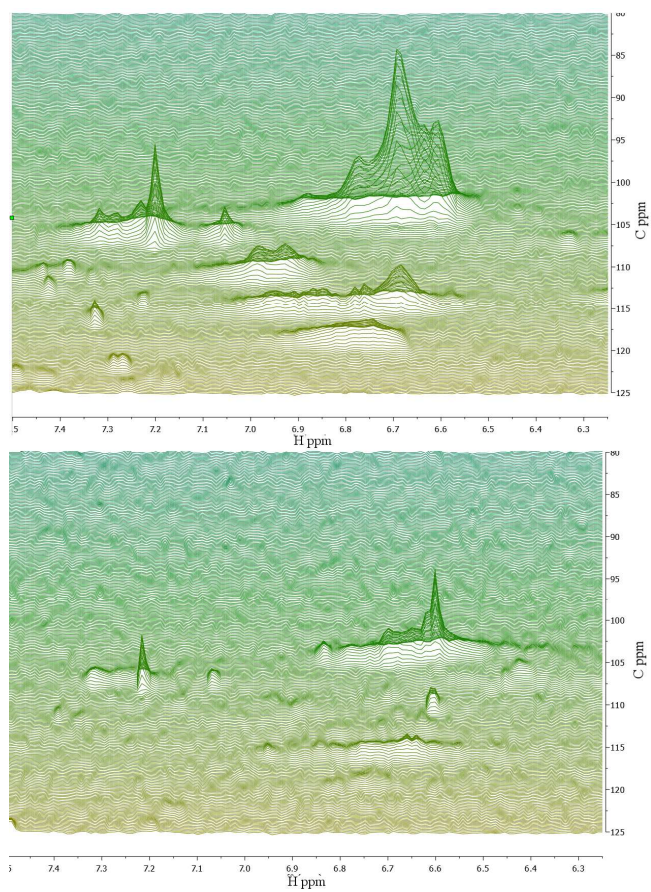

**Figure S2.** Topographic visualization of lignocellulosic biomass at untreated (above) and severity 4.7 (220 °C – 15 min) (below), focused on aromatic region.

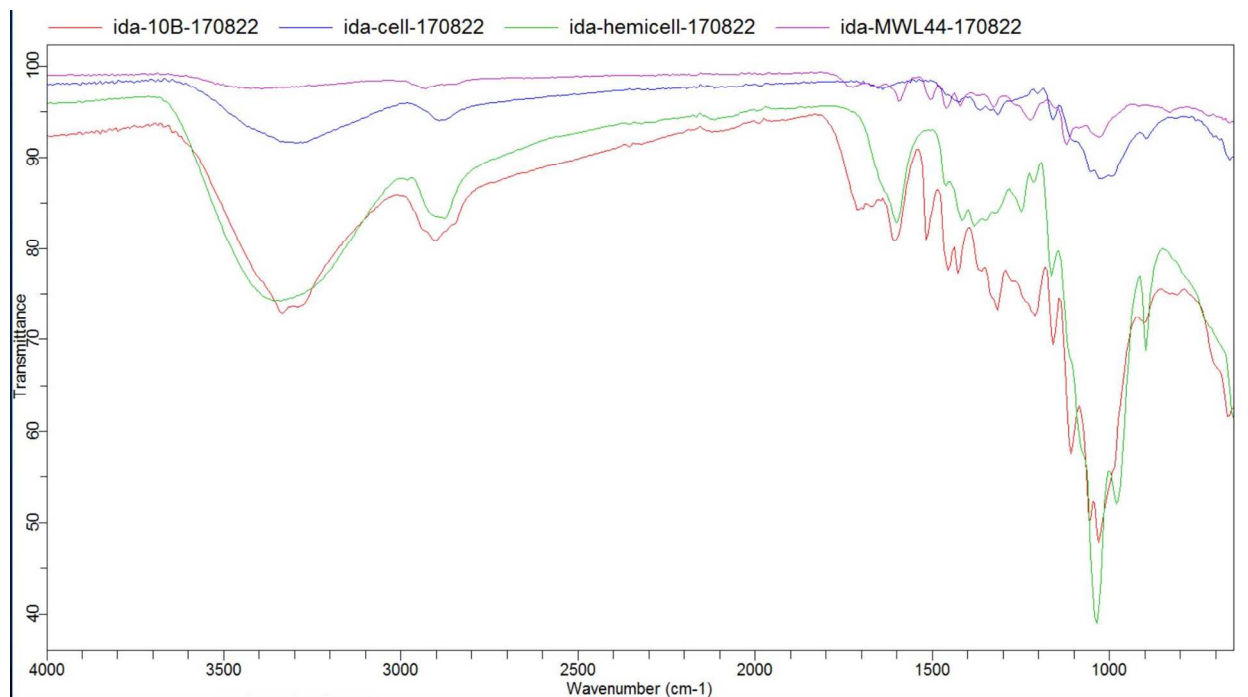

**Figure S3.** FTIR of milledwood lignin (red), cellulose (blue), hemicellulose (xylan, green) and se-treated biomass (220 °C, 15 min, purple)

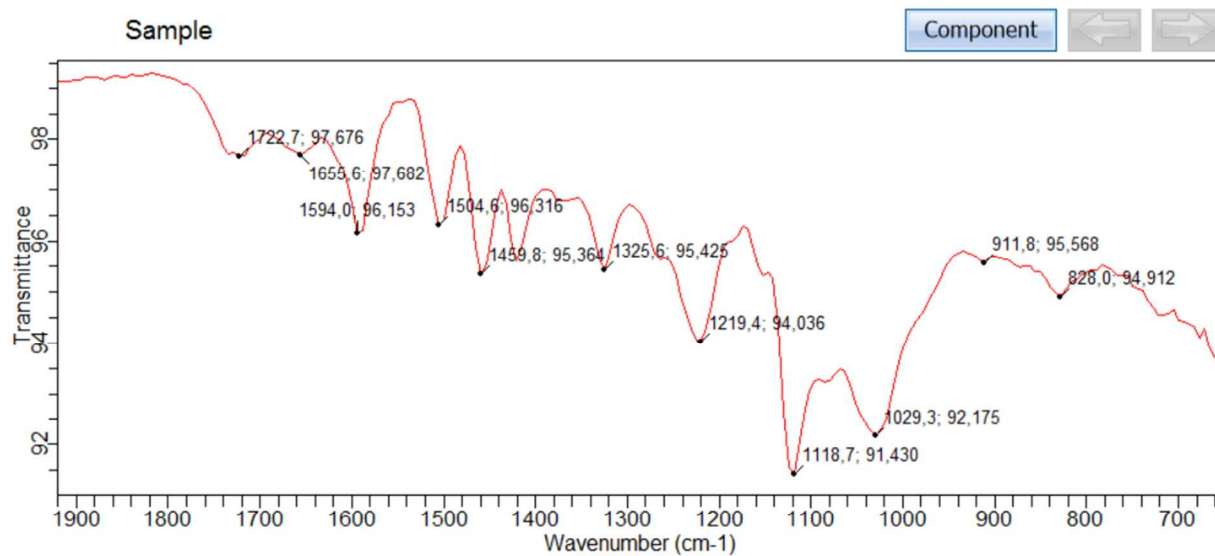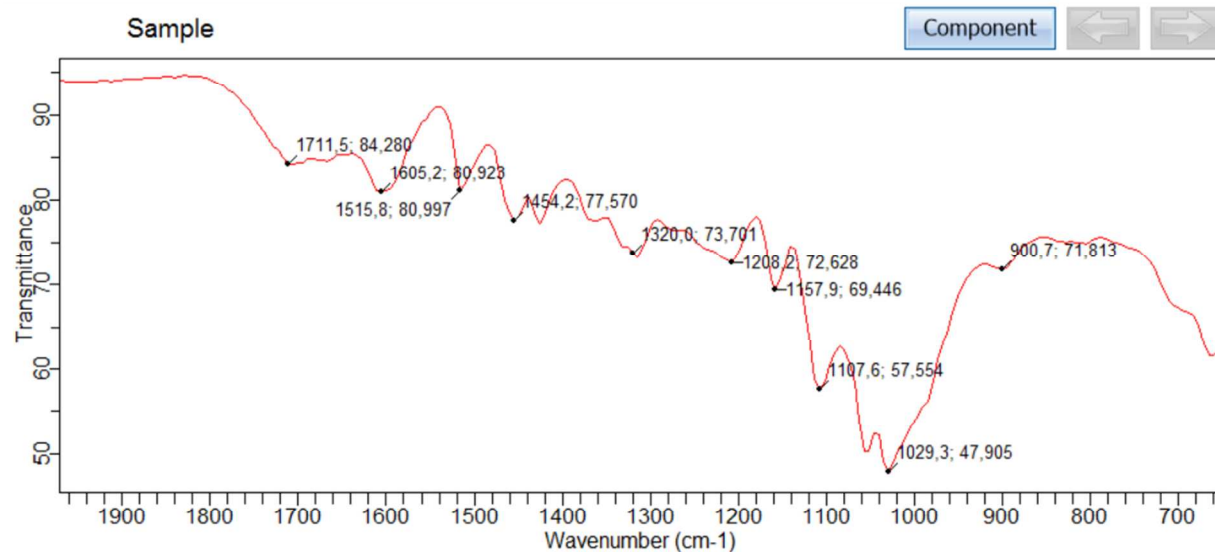

**Figure S4.** FT-IR of untreated biomass (above) and SE –treated with log R<sub>0</sub> 4.7 (below), focused in on 700 cm<sup>-1</sup> to 2000 cm<sup>-1</sup>.

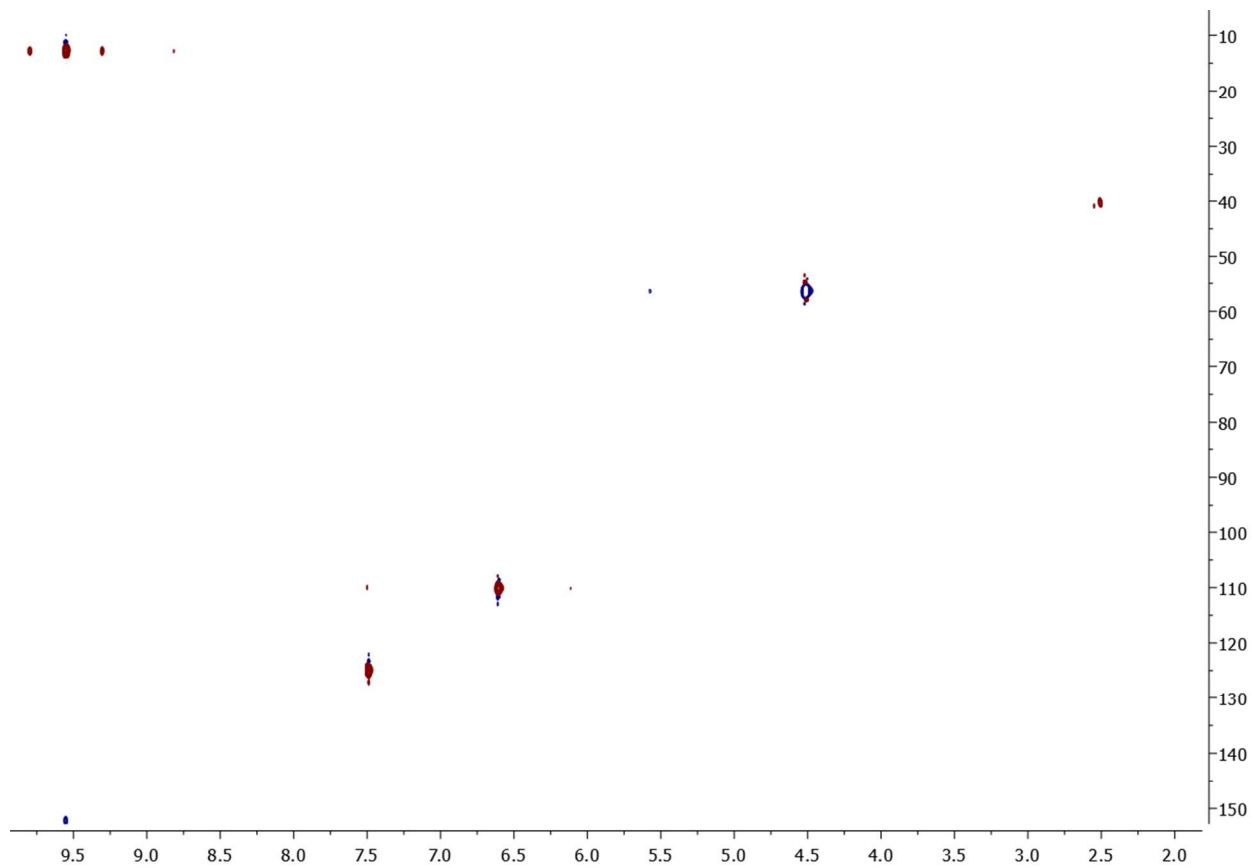

**Figure S5.** HSQC of 5-HMF standard in DMSO-d<sub>6</sub>.

**Table S1.** Detected components from py-GC-MS at 350 and 600 °C.

| ID | Name                        | M <sup>+</sup> | Retention time (min) | Structure                                                                             |
|----|-----------------------------|----------------|----------------------|---------------------------------------------------------------------------------------|
| 1  | Acetic acid                 | 60             | 7.99                 | 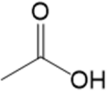   |
| 2  | Furfural                    | 96             | 19.58                |    |
| 3  | 2-Furanmethanol             | 98             | 21.22                |    |
| 4  | Not identified <sup>1</sup> | 114            | 23.98                |                                                                                       |
| 5  | Not identified              | 114            | 25.21                |                                                                                       |
| 6  | Not identified              | 128            | 27.35                |                                                                                       |
| 7  | 2,5-Furandicarboxaldehyde   | 124            | 28.35                |   |
| 8  | Not identified              | -              | 29.68                |                                                                                       |
| 9  | Furan                       | 68             | 30.93                |  |
| 10 | Not identified              | 152            | 33.87                |  |
| 11 | 2-Methoxy-4-vinylphenol     | 150            | 35.05                |  |

---

<sup>1</sup>

12 5-Hydroxymethyl furfural 126 35.94

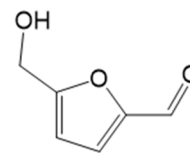

13 2,6-Dimethoxyphenol 154 37.14

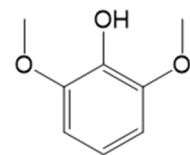

14 Carbohydrate 180 39.72

15 4-Hydroxy-3-methoxybenzaldehyde 152 41.27

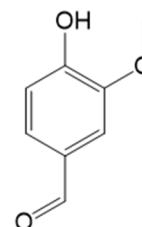

16 Not identified -- 43.4

17 1-(3,4-dimethoxyphenyl)ethanone 180 47.35

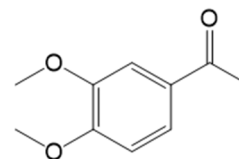

18 Carbohydrate 180 51.48

19 Not identified 166 51.79

20 4-Allyl-2,6-dimethoxyphenol 194 53.75

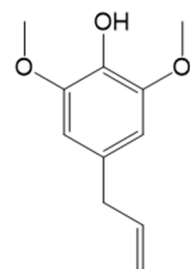

21 4-Hydroxy-3,5-dimethoxybenzaldehyde 182 54.79

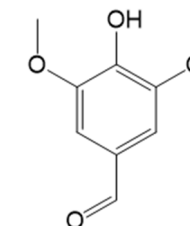

22 Not identified 196 56.9



23 4-[(*E*)-3-hydroxyprop-1-enyl]-2,6-dimethoxyphenol 210 60.07

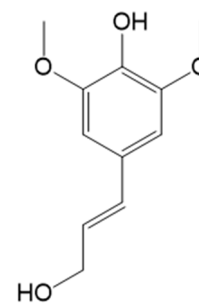

24 3-(4-hydroxy-3,5-dimethoxyphenyl)butan-2-one 224 62.02

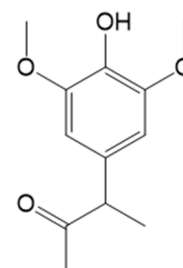

25 3,5-Dimethoxy-4-hydroxycinnamaldehyde 208 70

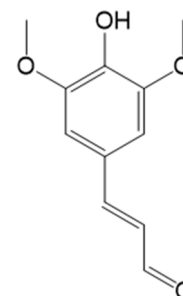

26 1-hydroxy-2-propanone 74 9.31

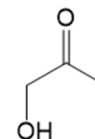

27 1,2-Ethandiol, monoacetate 104 16.53

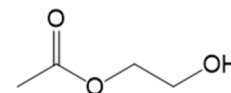

28 Pentanal, 2,4-dimethyl- 114 18.48

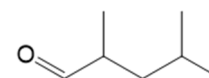

29 Propanoic acid, 2-oxo-, methyl ester 102 18.74

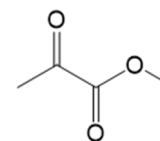

|    |                                        |     |       |                                                                                       |
|----|----------------------------------------|-----|-------|---------------------------------------------------------------------------------------|
| 30 | 2-Hydroxy-2-cyclopenten-1-one          | 98  | 23.24 | 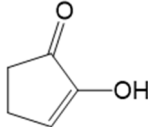   |
| 31 | 2-Methylene cyclopentanol              | 98  | 23.66 |    |
| 32 | 2-Furanone                             | 84  | 24.48 |    |
| 33 | Not identified                         | 112 | 25.77 |                                                                                       |
| 34 | 2-Hydroxy-3-methyl-2-cyclopenten-1-one | 112 | 25.89 |    |
| 35 | Phenol                                 | 94  | 26.31 |   |
| 36 | Phenol-2-methoxy-                      | 124 | 27.14 |  |
| 37 | Phenol-2-methyl-                       | 108 | 27.66 |  |
| 38 | 5-Hydroxymethyldihydrofuran-2-one      | 116 | 28.9  |  |
| 39 | Not identified                         | --  | 29.95 |                                                                                       |
| 40 | 2-Methoxy-4-methylphenol               | 138 | 30.14 |  |

|    |                |         |       |
|----|----------------|---------|-------|
| 41 | Coeluting      | 114/152 | 32.38 |
| 42 | Not identified | --      | 32.64 |

|    |                         |     |       |
|----|-------------------------|-----|-------|
| 43 | 4-Ethyl-2-methoxyphenol | 152 | 32.95 |
|----|-------------------------|-----|-------|

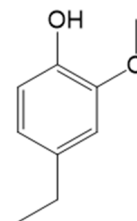

|    |                |     |       |
|----|----------------|-----|-------|
| 44 | Not identified | 164 | 36.06 |
|----|----------------|-----|-------|

|    |           |                     |       |
|----|-----------|---------------------|-------|
| 45 | Coeluting | 138/<br>164/<br>180 | 38.39 |
|----|-----------|---------------------|-------|

|    |                |     |       |
|----|----------------|-----|-------|
| 46 | Not identified | 144 | 38.95 |
|----|----------------|-----|-------|

|    |              |     |       |
|----|--------------|-----|-------|
| 47 | Carbohydrate | 244 | 39.71 |
|----|--------------|-----|-------|

|    |                                |     |       |
|----|--------------------------------|-----|-------|
| 48 | 2-methoxy-4-(1-propenyl)phenol | 164 | 40.66 |
|----|--------------------------------|-----|-------|

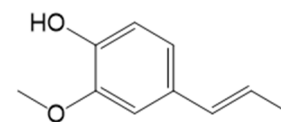

|    |                              |     |       |
|----|------------------------------|-----|-------|
| 49 | 2,6-Dimethoxy-4-methylphenol | 168 | 41.18 |
|----|------------------------------|-----|-------|

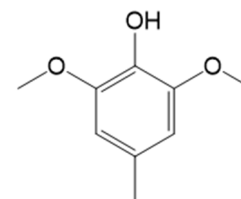

|    |                          |     |       |
|----|--------------------------|-----|-------|
| 50 | 2-Methoxy-4-propylphenol | 166 | 43.97 |
|----|--------------------------|-----|-------|

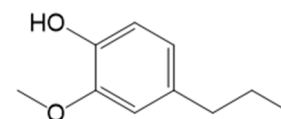

|    |                                 |     |       |
|----|---------------------------------|-----|-------|
| 51 | 5-tert-butylbenzene-1,2,3-triol | 182 | 44.69 |
|----|---------------------------------|-----|-------|

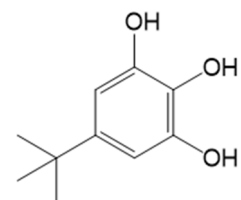

|    |                                       |     |       |
|----|---------------------------------------|-----|-------|
| 52 | 1-(4-Hydroxy-3-methoxyphenyl)ethanone | 166 | 45.13 |
|----|---------------------------------------|-----|-------|

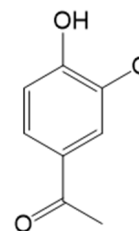

|    |                |     |       |
|----|----------------|-----|-------|
| 53 | Not identified | 194 | 48.33 |
|----|----------------|-----|-------|

|    |                |     |       |
|----|----------------|-----|-------|
| 54 | Not identified | 194 | 50.87 |
| 55 | Carbohydrate   | 180 | 51.55 |

|    |                                           |     |       |
|----|-------------------------------------------|-----|-------|
| 56 | 1-(4-Hydroxy-3,5-dimethoxyphenyl)ethanone | 196 | 58.12 |
|----|-------------------------------------------|-----|-------|

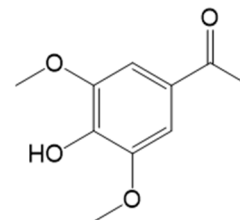

|    |                                               |     |       |
|----|-----------------------------------------------|-----|-------|
| 57 | 1-(4-Hydroxy-3,5-dimethoxyphenyl)propan-1-one | 210 | 61.77 |
|----|-----------------------------------------------|-----|-------|

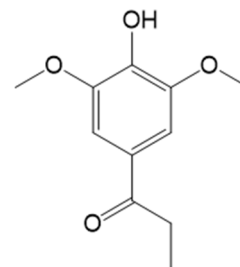

Supplement: ao8b00381_si_001.pdf [file ao8b00381_si_001.pdf]
